# Supplementary material for: Small GTPase FoSec4-Mediated Protein Secretion Is Important for Polarized Growth, Reproduction and Pathogenicity in the Banana Fusarium Wilt Fungus Fusarium odoratissimum
Source: MDPI journal article supplement (doi:10.3390/jof8080880), 2022-08-20
Supplement: s1 [file s1]

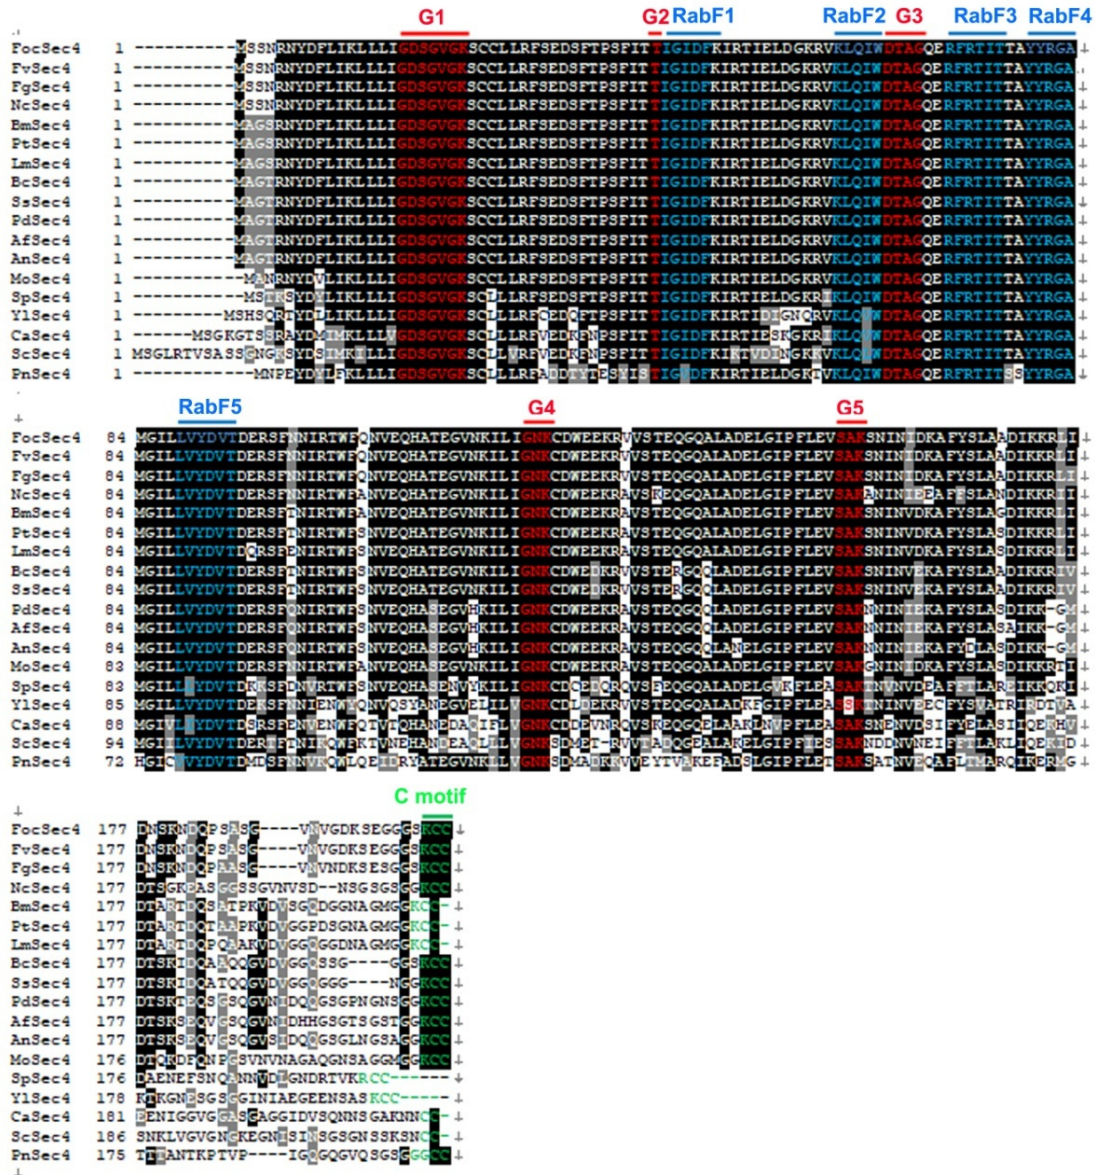

**Figure S1 Multiple alignment of Sec4 homologs in some fungi species.** The fungi species consists of *Fusarium odoratissimum* (Fo), *Fusarium verticillioides* (Fv), *Fusarium graminearum* (Fg), *Neurospora crassa* (Nc), *Magnaporthe oryzae* (Mo), *Aspergillus niger* (An), *Aspergillus fumigates* (Af), *Penicillium digitatum* (Pd), *Sclerotinia sclerotiorum* (Ss), *Botrytis cinerea* (Bc), *Bipolaris maydis* (Bm), *Leptosphaeria maculans* (Lm), *Pyrenophora tritici-repentis* (Pt), *Schizosaccharomyces pombe* (Sp), *Parastagonospora noaorum* (Pn), *Saccharomyces cerevisiae* (SC), *Candida albicans* (Ca), *Yarrowia lipolytica* (Yl). Five conserved domains labeled as G1 to G5 were in red, five Rab-specific labeled as RabF1 to RabF5 were in blue and a C-terminal domain labeled as C motif was in green.

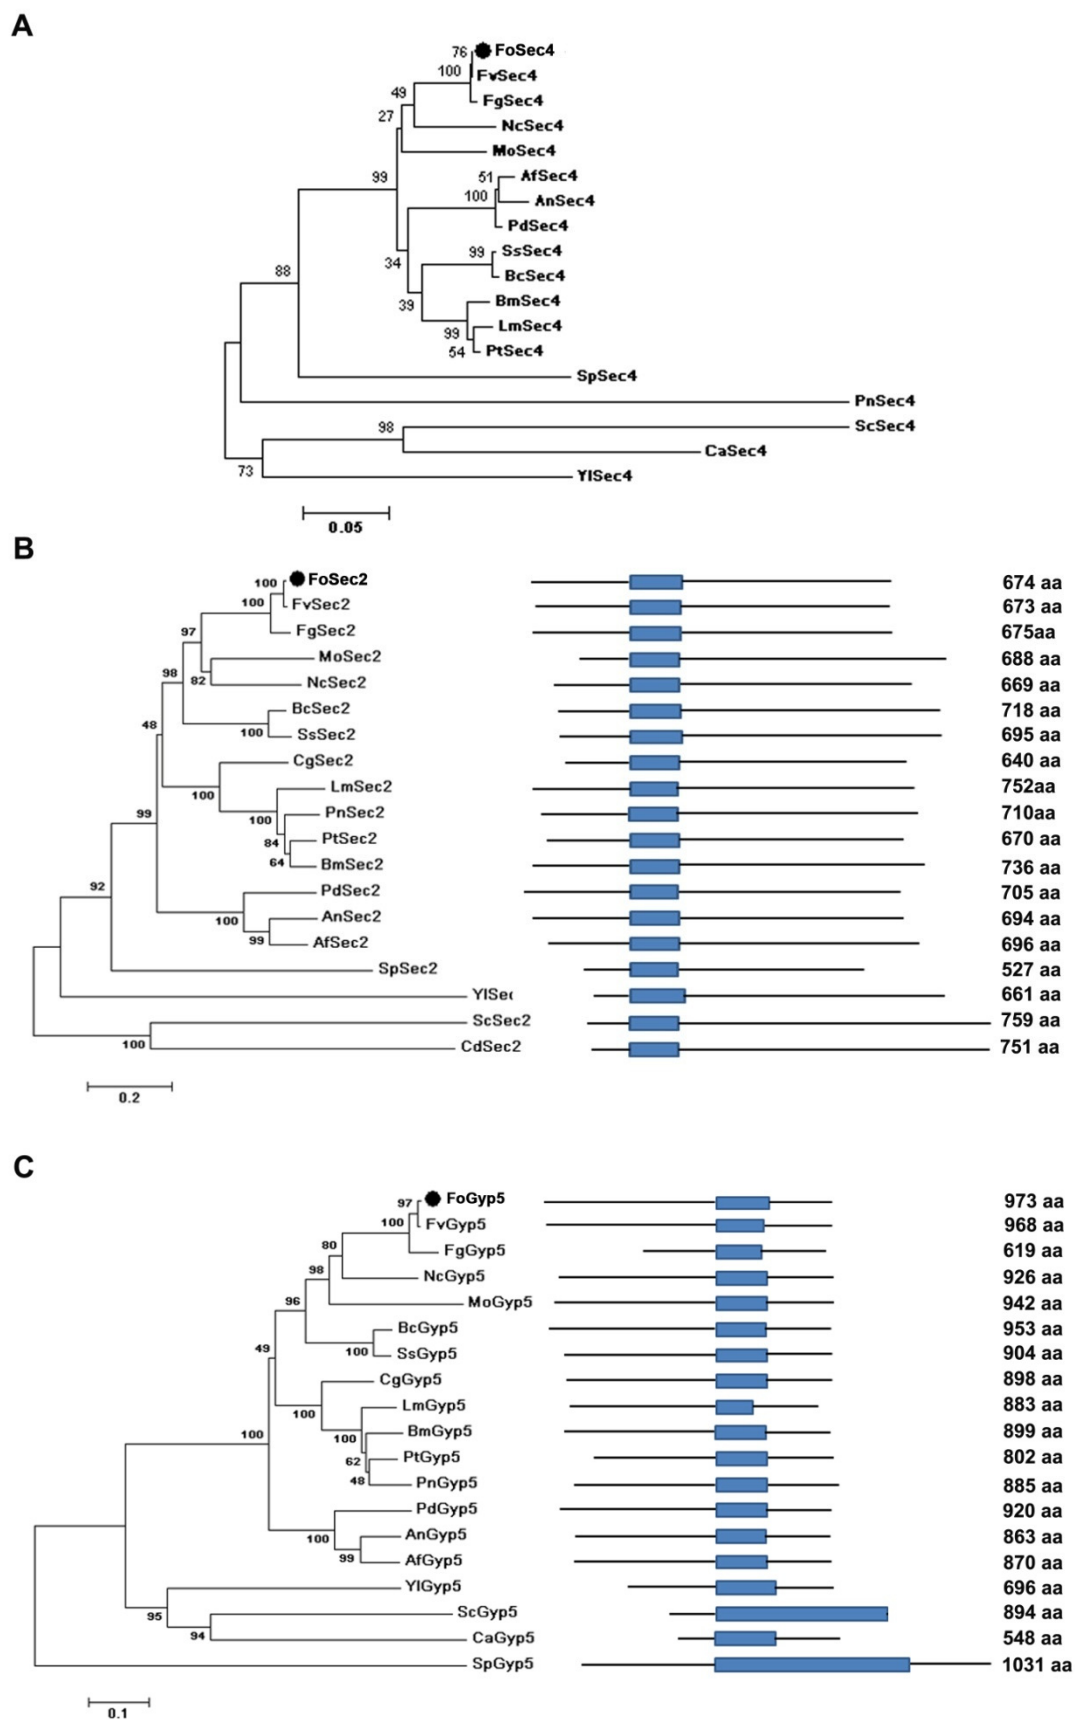

**Figure S2** Phylogenetic analysis of Sec4, Sec2 and Gyp5 homologs in some fungi species. The fungi species consists of *Fusarium odoratissimum* (Fo), *Fusarium verticillioides*

(Fv), *Fusarium graminearum* (Fg), *Neurospora crassa* (Nc), *Magnaporthe oryzae* (Mo), *Aspergillus niger* (An), *Aspergillus fumigates* (Af), *Penicillium digitatum* (Pd), *Sclerotinia sclerotiorum* (Ss), *Botrytis cinerea* (Bc), *Bipolaris maydis* (Bm), *Leptosphaeria maculans* (Lm), *Pyrenophora tritici-repentis* (Pt), *Schizosaccharomyces pombe* (Sp), *Parastagonospora noaorum* (Pn), *Saccharomyces cerevisiae* (Sc), *Candida albicans* (Ca), *Yarrowia lipolytica* (Yl). Evolutionary analyses were conducted in MEGA7.0. The evolutionary history was inferred based on the amino acid sequences by using a neighbor-joining method. The numbers at nodes showed the percentage of their occurrence in 1,000 bootstrap replicates. **(A)** Phylogenetic analysis of Sec4. **(B)** Phylogenetic analysis of Sec2 homologs (left panel). Values on the branches of clusters represent the results of bootstrap analysis. Schematic representations of the structures of Sec2 proteins (right panel). The Sec2 domain is shown in blue. **(C)** Phylogenetic analysis of Gyp5 homologs (left panel). Values on the branches of clusters represent the results of bootstrap analysis. Schematic representations of the structures of Gyp5 proteins (right panel). The TBC domain is shown in blue.

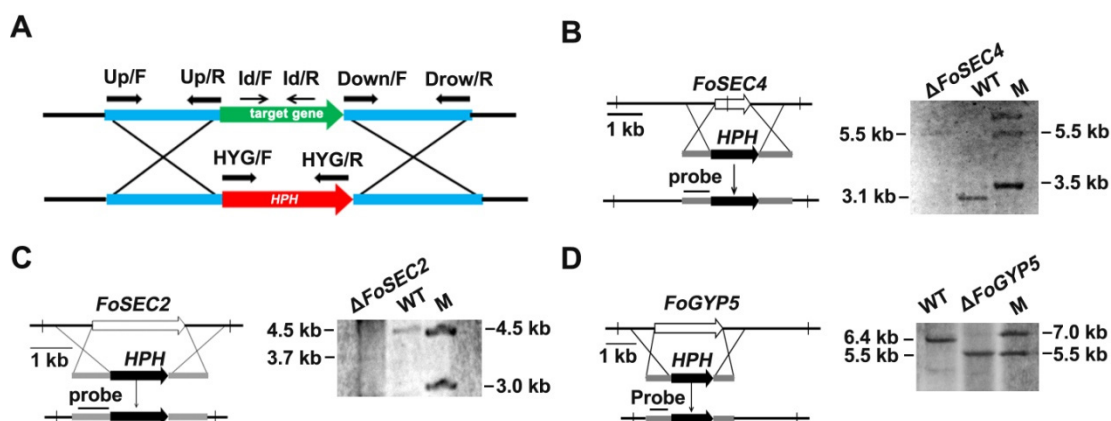

**Figure S3 Southern blot analyses of targeted gene deletion mutants.** (A) The split-marker approach was used to delete the targeted genes. (B) Targeted gene deletion of *FoSec4*, *Pst* I and *Kpn* I digested DNAs showed a 3.1 kb in the WT and a 5.5 kb band in mutants. (C) Targeted gene deletion of *FoSec2*, *Dra* I digested DNAs showed a 4.5 kb in the WT and a 3.7 kb band in mutants. (D) Targeted gene deletion of *FoGyp5*, *Dra* I and *Kas* I digested DNAs showed a 6.4 kb in the WT and a 5.5 kb band in mutants.

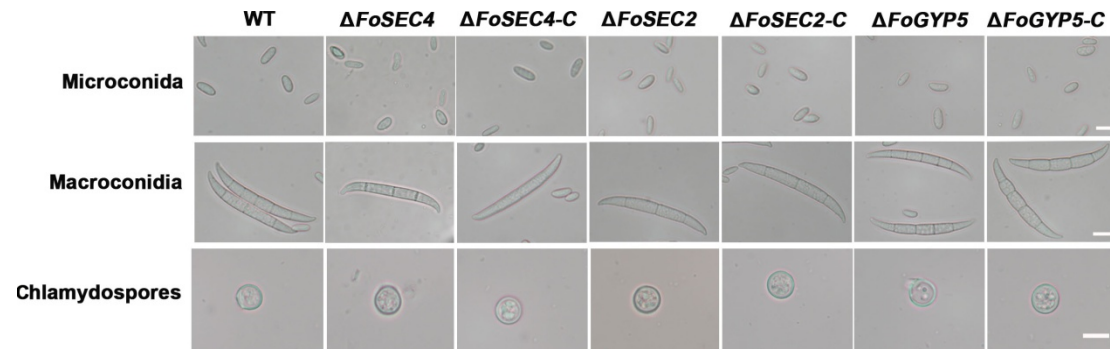

Figure S4 The morphology of the microconidia, macroconidia and chlamydospores in the wild-type(WT),  $\Delta FoSEC4$ ,  $\Delta FoSEC2$ ,  $\Delta FoGYP5$ ,  $\Delta FoSEC4-C$ ,  $\Delta FoSEC2-C$  and  $\Delta FoGYP5-C$  strains. Bar=10  $\mu m$ .

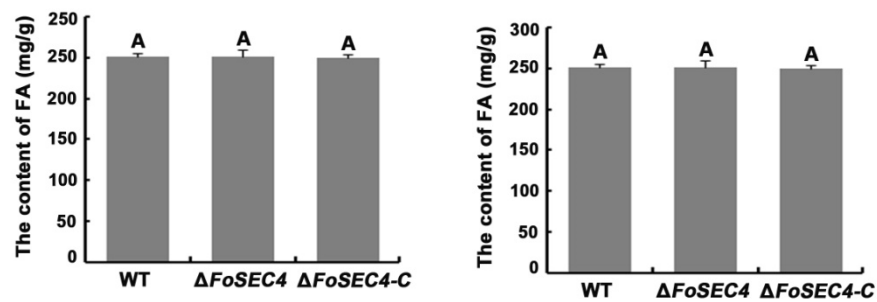

Figure S5 Fusaric acid production levels by wild-type (WT),  $\Delta FoSEC4$  and  $\Delta FoSEC4-C$  strains were analyzed by HPLC. Fusaric acid levels ( $mg\ g^{-1}$ ) were measured per mycelial dry weight.

Table S1 strains used in the study.

| Strain               | Genotype                                                 | Source     |
|----------------------|----------------------------------------------------------|------------|
| WT                   | <i>Fusarium odoratissimum</i> wild type strain           | This study |
| $\Delta FoSEC4$      | <i>FoSEC4</i> deletion mutant of <i>F. odoratissimum</i> | This study |
| WT-GFP               | The wild-type stain labeled with GFP                     | This study |
| $\Delta FoSEC4$ -GFP | The <i>FoSEC4</i> deletion mutant labeled with GFP       | This study |
| $\Delta FoSEC2$      | <i>FoSEC2</i> deletion mutant of <i>F. odoratissimum</i> | This study |
| $\Delta FoGYP5$      | <i>FoGYP5</i> deletion mutant of <i>F. odoratissimum</i> | This study |
| $\Delta FoSEC4$ -C   | Complemented strain with <i>FoSEC4</i>                   | This study |
| $\Delta FoSEC2$ -C   | Complemented strain with <i>FoSEC2</i>                   | This study |
| $\Delta FoGYP5$ -C   | Complemented strain with <i>FoGYP5</i>                   | This study |
| $\Delta FoSEC2$ -1   | Complemented strain with FoSec2 without the Sec2 domain  | This study |
| $\Delta FoSEC2$ -2   | Complemented strain with amino acids 184-677 of FoSec2   | This study |
| $\Delta FoSEC2$ -3   | Complemented strain with amino acids 1-277 of FoSec2     | This study |
| $\Delta FoGYP5$ -1   | Complemented strain with FoGyp5 without the TBC domain   | This study |
| $\Delta FoGYP5$ -2   | Complemented strain with amino acids 580-973 of FoGyp5   | This study |
| $\Delta FoGYP5$ -3   | Complemented strain with amino acids 184-677 of FoGyp5   | This study |

**Table S2 Primers used in this study**

| Name        | Sequence(5'→3')                                                                    | Relevant characteristics                                                                                       |
|-------------|------------------------------------------------------------------------------------|----------------------------------------------------------------------------------------------------------------|
| FoSEC4-up   | F:GAACCCGAGTTTGCAGAAAA<br>R:CATTCAATTGTTGACCTCCACTAGCT<br>CCACCAAGAGTGAGAGTAGCGGAA | PCR primers to amplify <i>FoSEC4</i> upstream fragment for the construction of <i>FoSEC4</i> deletion mutant   |
| FoSEC4-down | F:GCAAAGGAATAGAGTAGATGCCGA<br>CCGCCGAATACCCTAAGGAGTTCTG<br>R:AAGGCGATCATAAAGCAGGA  | PCR primers to amplify <i>FoSEC4</i> downstream fragment for the construction of <i>FoSEC4</i> deletion mutant |
| FoSEC4-nest | F:TCAAAGATAGGCGCCACAAT<br>R:AAGTGGCATGGCGATTCAAT                                   | PCR primers to amplify upstream-HPH-downstream fragment for deletion of <i>FoSEC4</i>                          |
| FoSEC4-id   | F:ATTATTCATCTGCATGCGACC<br>R:ATGTTGCTCTTGCGGAGA                                    | PCR primers for identification <i>FoSEC4</i> deletion transformants                                            |
| FoGYP5-up   | F:CCCATCAAATGCCCCGAGAAG<br>R:CATTCAATTGTTGACCTCCACTAGCT<br>CCAAGACGGAAGAGAGATGCTGT | PCR primers to amplify <i>FoGYP5</i> upstream fragment for the construction of <i>FoGYP5</i> deletion mutant   |
| FoGYP5-down | F:GCAAAGGAATAGAGTAGATGCCGA<br>CCGGAAAATCGAAAAAACTCCCG<br>R:TGCCTACTACCGTGCGTAAT    | PCR primers to amplify <i>FoGYP5</i> downstream fragment for the construction of <i>FoGYP5</i> deletion mutant |
| FoGYP5-nest | F:TGAAGCACGAAGACAAGCAC<br>R:GACTCTACGCCGTTGTTTCC                                   | PCR primers to amplify upstream-HPH-downstream fragment for deletion of <i>FoGYP5</i>                          |
| FoGYP5-id   | F: GATGGAGACTCACTACCCGG<br>R: AGATCCCGGCGTATTGTCTT                                 | PCR primers for identification <i>FoGYP5</i> deletion transformants                                            |
| HYG         | F:TGGAGCTAGTGGAGGTCAACAATG<br>AATG<br>R:CGGTCGGCATCTACTCTATTCCTTT<br>GC            | PCR primers for amplification of hygromycin resistance gene ( <i>HPH</i> )                                     |
| FoSEC2-up   | F:CGAGTGAGGCGAAAAGGAAG<br>R:CATTCAATTGTTGACCTCCACTAGCT<br>CCAGGGCGTATGTGTGTCAGTTG  | PCR primers to amplify <i>FoSEC2</i> upstream fragment for the construction of <i>FoSEC2</i> deletion mutant   |
| FoSEC2-down | F:GCAAAGGAATAGAGTAGATGCCGA<br>CCGGTGATATCGACGCCACTGTG<br>R:AAGGCTGGAAAGGAGAAAGC    | PCR primers to amplify <i>FoSEC2</i> downstream fragment for the construction of <i>FoSEC2</i> deletion mutant |
| FoSEC2-nest | F:TGCCTTTCAAGTCCCTGGAT<br>R:AAGGAGGGGAGACGAGGTTA                                   | PCR primers to amplify upstream-HPH-downstream fragment for deletion of <i>FoSEC2</i>                          |

|                   |                                                                                         |                                                                                                    |
|-------------------|-----------------------------------------------------------------------------------------|----------------------------------------------------------------------------------------------------|
| FoSEC2-id         | F:ACGTCACCAGCCAACATTTTC<br>R:GCTTGCACCTTCTTCTCTCG                                       | PCR primers for identification <i>FoSEC2</i> deletion transformants                                |
| FoSEC4CA<br>-up   | F:GAACCCGAGTTTGCAGAAAA<br>R:ACCGGCGGTATCCCAGATCTGC                                      | PCR primers to amplify upstream fragment for the construction of <i>FoSEC4CA</i> point mutant      |
| FoSEC4CA<br>-down | F:GCAGATCTGGGATACCGCCGGTCT<br>GGAGCGTTTCCGCACCAT<br>R:TCCTAGCCATGTGCTACTTGA             | PCR primers to amplify downstream fragment for the construction of <i>FoSEC4CA</i> point mutant    |
| FoSEC4DN<br>-up   | F:GAACCCGAGTTTGCAGAAAA<br>R:GCCAATTAGAATCTTGTTGACA                                      | PCR primers to amplify upstream fragment for the construction of <i>FoSEC4DN</i> point mutant      |
| FoSEC4DN<br>-down | F:TGTCAACAAGATTCTAATTGGCATC<br>AAGTGC GACTGGGAGGA<br>R:AGAGCAAACGGGTCAGAAAG             | PCR primers to amplify downstream fragment for the construction of <i>FoSEC4DN</i> point mutant    |
| G418-1            | F:TCTAGATTAACGCTTACAATTTCCTCA<br>R:GCCCCAATAGCAGCCAGTCC                                 | PCR primers for amplification upstream of neomycin resistance gene                                 |
| G418-2            | F:CAACAACACGCATCATCCCCA<br>R:TCAGAAGAACTCGTCAAGAA                                       | PCR primers for amplification downstream of neomycin resistance gene                               |
| FoSEC4-N<br>P     | F:GAACCCGAGTTTGCAGAAAA<br>R:TCCTCGCCCTTGCTCACCATTGTGA<br>CCAAGAGTGAGAGTAGCG             | PCR primers to amplify <i>FoSEC4</i> upstream fragment for the construction of <i>GFP-FoSec4</i>   |
| FoSEC4-GF<br>P    | F:GGCGGAGGCGGCGGAGGCGGAGG<br>CGGAGGCTCGAGTAATCGTAACTATG<br>R:CGAACTCCTTAGGGTATTTCGG     | PCR primers to amplify <i>FoSEC4</i> downstream fragment for the construction of <i>GFP-FoSec4</i> |
| GFP-1             | F:ATGGTGAGCAAGGGCGAGGA<br>R:ATGGGGGTGTTCTGCTGGTA                                        | PCR primers for amplification upstream of GFP                                                      |
| GFP-2             | F:AAGCAGCACGACTTCTTCAA<br>R:GCCTCCGCCTCCGCCTCCGCCGCC<br>TCCGCCCTTGACAGCTCGTCCATGC       | PCR primers for amplification downstream of GFP                                                    |
| FoSEC2-N<br>P     | F:CGAGTGAGGCGAAAAGGAAG<br>R:TCCTCGCCCTTGCTCACCATTGTGA<br>TCGGGCGTATGTGTG                | PCR primers to amplify <i>FoSEC4</i> upstream fragment for the construction of <i>GFP-FoSec2</i>   |
| FoSEC2-GF<br>P    | F:GGCGGAGGCGGCGGAGGCGGAGG<br>CGGAGGCGACTCGTACGTTGCCATC<br>AT<br>R:ACGTCACCAGCCAACATTTTC | PCR primers to amplify <i>FoSEC4</i> downstream fragment for the construction of <i>GFP-FoSec2</i> |



---

|                     |                                                                                                            |                                                                                                    |
|---------------------|------------------------------------------------------------------------------------------------------------|----------------------------------------------------------------------------------------------------|
| FoGyp5-G<br>FP      | F:AGGGAACAAAAGCTGGGTACC<br>AGCCAGAAAAGGACTCGTGA<br>R:GCCCTTGCTCACCATAAGCTT<br>TGCAAAGTACGCTTCAAGT          | PCR primers to amplify <i>FoGYP5</i> full<br>fragment for the construction of<br><i>FoGyp5-GFP</i> |
| BD-SEC4             | F:TCAGAGGAGGACCTGCATATGATG<br>TCGAGTAATCGTAACT<br>R:TCGACGGATCCCCGGGAATTCTTA<br>GCAGCACTTGCTGCCC           | PCR primers for BD-Sec4 constructs using<br>pGBKT7                                                 |
| AD-GYP5(<br>N)      | F:GTACCAGATTACGCTCATATGATGT<br>CGCAACCGCAAGATG<br>R:ATGCCCACCCGGGTGGAATTCTTAT<br>AGTGTCGCCGCGTCCT          | PCR primers to amplify N teminal of<br><i>FoGyp5</i> for AD-GYP5 N teminal<br>constructs           |
| AD-GYP5(<br>TBC)    | F:GTACCAGATTACGCTCATATGATGC<br>AGAAACTGGAAAAGAC<br>R:ATGCCCACCCGGGTGGAATTCTTA<br>CAGGAGAATGCTGGCAT         | PCR primers to amplify TBC domain of<br><i>FoGyp5</i> for AD-GYP5 TBC domain<br>constructs         |
| AD-GYP5(<br>C)      | F:GTACCAGATTACGCTCATATGATGG<br>GATTATCTGACATGCAG<br>R:ATGCCCACCCGGGTGGAATTCTCA<br>TGCAAAGTACGCTTC          | PCR primers to amplify C teminal of<br><i>FoGyp5</i> for AD-GYP5 C teminal<br>constructs           |
| AD-SEC2(<br>N)      | F:GTACCAGATTACGCTCATATGATGG<br>ACTCATTTATTCCAA<br>R:ATGCCCACCCGGGTGGAATTCTTA<br>GGCCTGCCACACCTTCTT         | PCR primers to amplify N teminal of<br><i>FoSec2</i> for AD-SEC2 N teminal constructs              |
| AD-SEC2(S<br>ec2)   | F:GTACCAGATTACGCTCATATGATGA<br>AGGTCGCCGCGGAACGTCAAA<br>R:ATGCCCACCCGGGTGGAATTCTTA<br>ATGATCTCCTCGTTCCGAAG | PCR primers to amplify Sec2 domain of<br><i>FoSec2</i> for AD-SEC2 Sec2 domain<br>constructs       |
| AD-SEC2(<br>C)      | F:GTACCAGATTACGCTCATATGATGA<br>ATAACCCCACTGCTCCCTCT<br>R:ATGCCCACCCGGGTGGAATTCTTA<br>ATCCGTAGTCGGAATC      | PCR primers to amplify C teminal of<br><i>FoSec2</i> for AD-SEC2 C teminal constructs              |
| AD-SEC2(<br>N-Sec2) | F:GTACCAGATTACGCTCATATGATGG<br>ACTCATTTATTCCAA<br>R:ATGCCCACCCGGGTGGAATTCTTA<br>ATGATCTCCTCGTTCCGAAG       | PCR primers to amplify N-Sec2 region of<br><i>FoSec2</i> for AD-SEC2 N-Sec2 region<br>constructs   |
| AD-SEC2(S<br>ec2-C) | F:GTACCAGATTACGCTCATATGATGA<br>AGGTCGCCGCGGAACGTCAAA                                                       | PCR primers to amplify Sec2-C region of<br><i>FoSec2</i> for AD-SEC2 Sec2-C region<br>constructs   |

---



---

|              |                                                                                                         |                                      |
|--------------|---------------------------------------------------------------------------------------------------------|--------------------------------------|
|              | R:ATGCCACCCGGGTGGAATTCTTA<br>ATCCGTAGTCGGAATC                                                           |                                      |
| AD-<br>EXO70 | F:GTACCAGATTACGCTCATATGATGT<br>CGGTCGGACTCTCTG<br><br>R:ATGCCACCCGGGTGGAATTCTCA<br>GGAAGCCAAACTGGAA     | PCR primers for AD- EXO70 constructs |
| AD-<br>GYP1p | F:GTACCAGATTACGCTCATATGATGG<br>TCCAAGTCGACCGAT<br><br>R:ATGCCACCCGGGTGGAATTCTCA<br>CAGTTGTAGGTTTCGTA    | PCR primers for AD- GYP1p constructs |
| AD- GYP5     | F:GTACCAGATTACGCTCATATGATGT<br>CGCAACCGCAAGATG<br><br>R:ATGCCACCCGGGTGGAATTCTCA<br>TGCAAAGTACGCTTC      | PCR primers for AD- GYP5 constructs  |
| AD- KES1     | F:GTACCAGATTACGCTCATATGATGT<br>CCTCTTCTACAGCCC<br><br>R:ATGCCACCCGGGTGGAATTCCTAT<br>CGACCAAGAAGCTCC     | PCR primers for AD- KES1 constructs  |
| AD- MRS6     | F:GTACCAGATTACGCTCATATGATGG<br>AATCCCTCTCAGACA<br><br>R:ATGCCACCCGGGTGGAATTCCTA<br>GTCGAAGGGATCATCA     | PCR primers for AD- MRS6 constructs  |
| AD- MSB3     | F:GTACCAGATTACGCTCATATGATGA<br>CTCCCCTCGCTATT<br><br>R:ATGCCACCCGGGTGGAATTCCTAT<br>CCCACGTTCCACGTC      | PCR primers for AD- MSB3 constructs  |
| AD- MYO2     | F:<br>GTACCAGATTACGCTCATATGATGGC<br>ATCGGCCTACGAGG<br><br>R:ATGCCACCCGGGTGGAATTCCTA<br>CTGCTCTACTTCCACC | PCR primers for AD- MYO2 constructs  |
| AD-SEC2      | F:GTACCAGATTACGCTCATATGATGG<br>ACTCATTTATTCAA<br><br>R:ATGCCACCCGGGTGGAATTCTTA<br>ATCCGTAGTCGGAATC      | PCR primers for AD- SEC2 constructs  |
| AD- SEC3     | F:GTACCAGATTACGCTCATATGATGG<br>ACCGCCCAAACGG<br><br>R:ATGCCACCCGGGTGGAATTCTCA                           | PCR primers for AD- SEC3 constructs  |

---

---

|                   |                                                                                                        |                                                                                                                       |
|-------------------|--------------------------------------------------------------------------------------------------------|-----------------------------------------------------------------------------------------------------------------------|
|                   | ACGGAATGCGGCCTTG                                                                                       |                                                                                                                       |
| AD- SEC15         | F:GTACCAGATTACGCTCATATGATGC<br>CGCGACGTCCGCCTG<br><br>R:ATGCCCACCCGGGTGGAATTCTCA<br>TGTTTCGGTTTATGCCA  | PCR primers for AD- SEC15 constructs                                                                                  |
| AD- SRO7p         | F:GTACCAGATTACGCTCATATGATGG<br>CGGCTTTCCTGCGCG<br><br>R:ATGCCCACCCGGGTGGAATTCTTA<br>AAAGAACTTGCTCTTA   | PCR primers for AD- SRO7p constructs                                                                                  |
| AD- YPT1          | F:GTACCAGATTACGCTCATATGATGA<br>ACCCTGAATACGACT<br><br>R:ATGCCCACCCGGGTGGAATTCTTA<br>GCAGCAGCTGTTGTTG   | PCR primers for AD- YPT1 constructs                                                                                   |
| FoGyp5-1-<br>up   | F:AGGGAACAAAAGCTGGGTACCAG<br>CCAGAAAAGGACTCGTGA<br><br>R:TAGTGTCGCCGCGTCCTCCTTGTCCTCCGCTCCGCTCA        | PCR primers to amplify upstream fragment of FoGyp5 without the TBC domain for the construction of $\Delta FoGYP5-1$   |
| FoGyp5-1-<br>down | F:AGGAGGACGCGGCGACACTAGGA<br>TTATCTGACATGCAGCA<br><br>R:GCCCTTGCTCACCATAAGCTT<br>TGCAAAGTACGCTTCAAGT   | PCR primers to amplify downstream fragment of FoGyp5 without the TBC domain for the construction of $\Delta FoGYP5-1$ |
| FoGyp5-2-<br>up   | F:AGGGAACAAAAGCTGGGTACCAG<br>CCAGAAAAGGACTCGTGA<br><br>R:GTCTTTTCCAGTTTCTGCATGGTTG<br>AGGAGGAGGGTGTTG  | PCR primers to amplify upstream fragment of FoGyp5 without N teminal for the construction of $\Delta FoGYP5-2$        |
| FoGyp5-2-<br>down | F:ATGCAGAACTGGAAGACAAT<br>ACGCCGGGATCTTGGTG<br><br>R:GCCCTTGCTCACCATAAGCTT<br>TGCAAAGTACGCTTCAAGT      | PCR primers to amplify downstream fragment of FoGyp5 without N teminal for the construction of $\Delta FoGYP5-2$      |
| FoGyp5-3          | F:AGGGAACAAAAGCTGGGTACCAG<br>CCAGAAAAGGACTCGTGA<br><br>R:GCCCTTGCTCACCATAAGCTT<br>CAGGAGAATGCTGGCATTCT | PCR primers to amplify FoGyp5 without C teminal for the construction of $\Delta FoGYP5-3$                             |
| FoSec2-1-<br>up   | F:AGGGAACAAAAGCTGGGTACC<br>AAACTCGGCCTAGCTTCTGT<br><br>R:GGCCTGCCACACCTTCTTTTCGTCC<br>TCAACGGTGTGCTTG  | PCR primers to amplify upstream fragment of FoSec2 without the Sec2 domain for the construction of $\Delta FoSEC2-1$  |

---

---

|               |                                                                                                      |                                                                                                                             |
|---------------|------------------------------------------------------------------------------------------------------|-----------------------------------------------------------------------------------------------------------------------------|
| FoSec2-1-down | F:AAGAAGGTGTGGCAGGCCAATAAC<br>CCCACTGCTCCCTC<br>R:GCCCTTGCTCACCATAAGCTT<br>ATCCGTAGTCGGAATCGTGA      | PCR primers to amplify downstream<br>fragment of FoSec2 without the TBC<br>domain for the construction of $\Delta FoSEC2-1$ |
| FoSec2-2-up   | F:AGGGAACAAAAGCTGGGTACC<br>AAACTCGGCCTAGCTTCTGT<br>R:CGTTCCGCGGCGACCTTCATTGTGA<br>TCGGGCGTATGTGTG    | PCR primers to amplify upstream<br>fragment of FoSec2 without N-terminal for<br>the construction of $\Delta FoSEC2-2$       |
| FoSec2-2-down | F:ATGAAGGTCGCCGCGGAACGTCAA<br>AAGCGACTTGACACAG<br>R: R:GCCCTTGCTCACCATAAGCTT<br>ATCCGTAGTCGGAATCGTGA | PCR primers to amplify downstream<br>fragment of FoSec2 without N-terminal for<br>the construction of $\Delta FoSEC2-2$     |
| FoSec2-3      | F:AGGGAACAAAAGCTGGGTACC<br>AAACTCGGCCTAGCTTCTGT<br>R:GCCCTTGCTCACCATAAGCTTATGA<br>TCTCCTCGTTCCGAAG   | PCR primers to amplify FoSec2 without<br>C-terminal for the construction of<br>$\Delta FoSEC2-3$                            |

---
